# Supplementary material for: Effects of Compound Polysaccharides Derived from Astragalus and Glycyrrhiza on Growth Performance, Meat Quality and Antioxidant Function of Broilers Based on Serum Metabolomics and Cecal Microbiota
Source: MDPI journal article supplement (doi:10.3390/antiox11101872), 2022-09-21
Supplement: s1 [file s1]

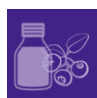

## Supplementary materials

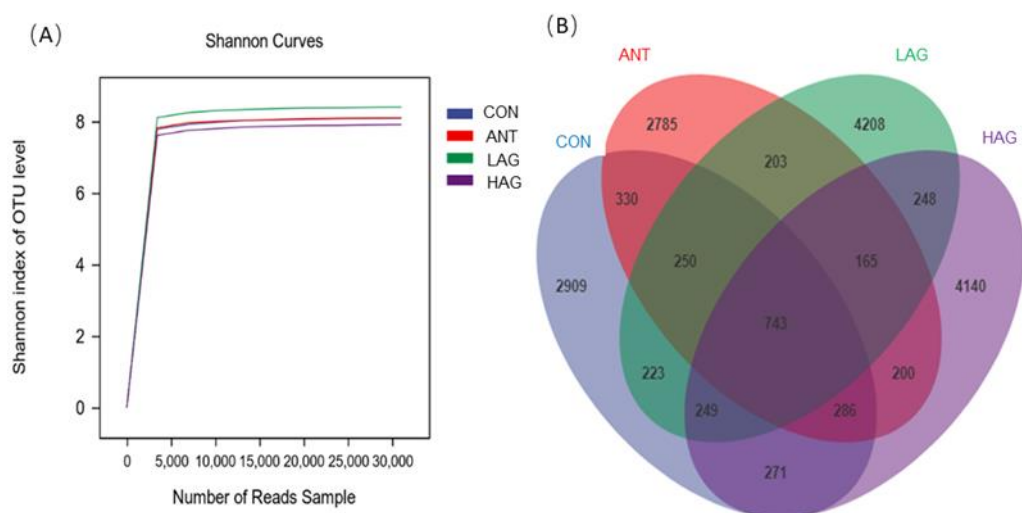

Figure S1. (A)Shannon dilution curve analysis (B)Venn diagram analysis

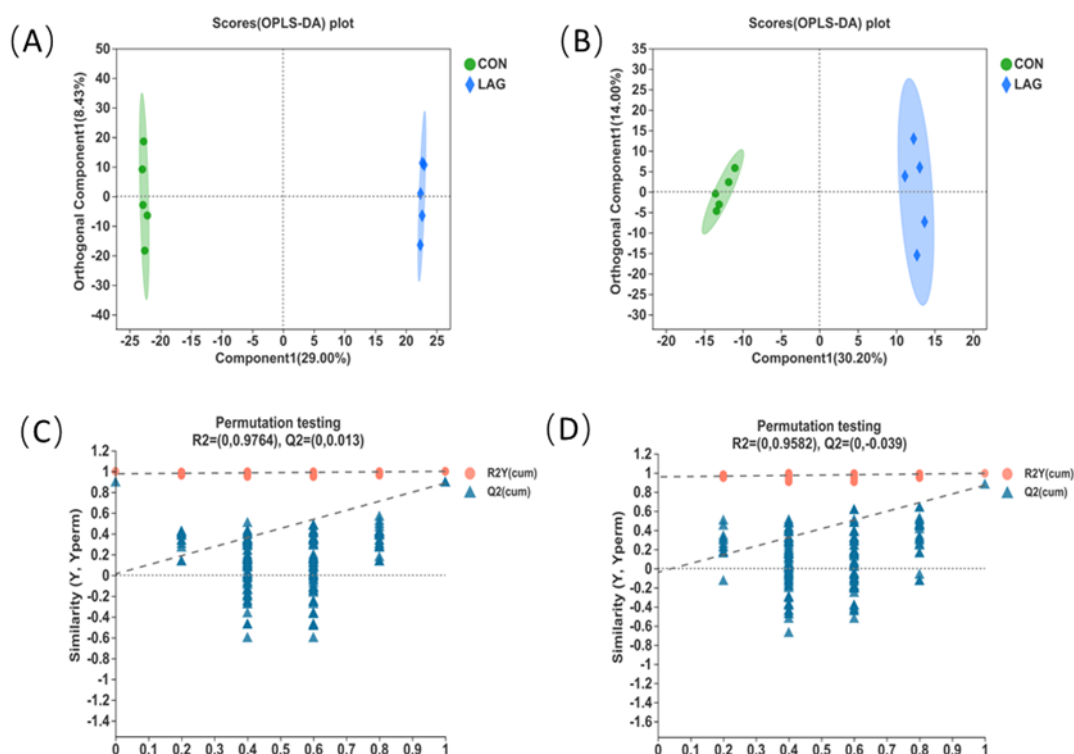

Figure S2. (A) Orthogonal partial least squares discriminant analysis (OPLS-DA) and (C) response permutation testing (RPT) of serum metabolites between CON and LAG groups in positive ion mode. (B) Orthogonal partial least squares discriminant analysis (OPLS-DA) and (D) response permutation testing (RPT) of serum metabolites between CON and LAG groups in negative ion mode.  $R^2X$  and  $R^2Y$  represent the interpretation rate of the built model to the X and Y matrix,  $R^2X$  (cum) and  $R^2Y$  (cum) represent the cumulative interpretation rate;  $Q^2$  indicates the predictive power of the model.

**Table S1.** Composition and nutrient levels of basal diet (air-dry basis, %).

| Items                        | 1 to 21 days of age | 22 to 42 days of age |
|------------------------------|---------------------|----------------------|
| Ingredients                  |                     |                      |
| Corn                         | 54.50               | 55.42                |
| Soybean meal                 | 29.70               | 25.30                |
| Corn gluten meal             | 8.00                | 8.00                 |
| CaHPO <sub>4</sub>           | 1.30                | 1.20                 |
| Limestone                    | 1.40                | 1.40                 |
| NaCl                         | 0.30                | 0.30                 |
| Soybean oil                  | 2.80                | 6.50                 |
| Soda                         | 0.15                | 0.15                 |
| L-Lysine                     | 0.87                | 0.80                 |
| DL-Methionine                | 0.25                | 0.21                 |
| Threonine                    | 0.13                | 0.12                 |
| Premix <sup>1</sup>          | 0.60                | 0.60                 |
| Total                        | 100.00              | 100.00               |
| Nutrient levels <sup>2</sup> |                     |                      |
| Metabolizable energy (MJ/kg) | 12.61               | 13.59                |
| Crude protein                | 23.39               | 21.19                |
| Calcium                      | 0.77                | 0.72                 |
| Total phosphorus             | 0.56                | 0.54                 |
| Lysine                       | 1.50                | 1.34                 |
| Methionine                   | 0.62                | 0.55                 |
| Threonine                    | 0.97                | 0.88                 |

<sup>1</sup> Supplied per kilogram of diet: for 1 to 21d, 12000 IU vitamin A; 4500 IU vitamin D<sub>3</sub>; 30 IU vitamin E; 4.5 mg vitamin K; 2.8 mg vitamin B<sub>1</sub>; 9.6 mg vitamin B<sub>2</sub>; 3.75 mg vitamin B<sub>6</sub>; 30 µg vitamin B<sub>12</sub>; 49.5 mg niacin; 20 mg calcium pantothenate; 1.5 mg folic acid; 0.18 mg biotin; 500 mg choline; 100 mg Zn; 110 mg Fe; 20 mg Cu; 120 mg Mn; 0.7 mg I; 0.3 mg Se. For 22 to 42d, 10000 IU vitamin A; 3750 IU vitamin D<sub>3</sub>; 25 IU vitamin E; 3.75 mg vitamin K; 2.3 mg vitamin B<sub>1</sub>; 8 mg vitamin B<sub>2</sub>; VB<sub>6</sub>, 3.1 mg vitamin B<sub>6</sub>; 25 µg vitamin B<sub>12</sub>; 41.2 mg niacin; 20 mg calcium pantothenate; 1.25 mg folic acid; 0.12 mg biotin; 400 mg choline; 100 mg Zn; 110 mg Fe; 20 mg Cu; 120 mg Mn; 0.7 mg I; 0.3 mg Se. <sup>2</sup> Metabolizable energy was calculated, while the others were measured.

**Table S2.** Primer sequences used for the quantitative real-time PCR.

| Gene           | Sequence (5'–3')                                                  | Accession number | Amplicon size (bp) |
|----------------|-------------------------------------------------------------------|------------------|--------------------|
| <i>SOD1</i>    | Forward: AAATGGGTGTACCAGCGCA<br>Reverse: CTTTGCAGTCACATTGCCGA     | NM_205064.1      | 109                |
| <i>SOD2</i>    | Forward: GAGGGGAGCCTAAAGGAGAAT<br>Reverse: TCTTGATTTGCACAGGCTGC   | NM_204211.1      | 175                |
| <i>GSH-PX1</i> | Forward: TCACCATGTTCGAGAAGTGC<br>Reverse: ATGTACTGCGGGTTGGTCAT    | NM_001277853.1   | 124                |
| <i>GAPDH</i>   | Forward: AGCCATTCTCCACCTTTGAT<br>Reverse: AGTCCACAACACGGTTGCTGTAT | NM_204305        | 112                |

Note: *SOD1*: superoxide dismutase 1; *SOD2*: superoxide dismutase 2; *GSH-Px*: glutathione peroxidase; *GAPDH*: glyceraldehyde 3-phosphate dehydrogenase.
